# Supplementary material
Source: HighWire-hosted journal article supplement (https://www.cmajopen.ca/content/suppl/2015/11/26/3.4.E428)
Supplement: open-2014-0078-original-submission.pdf [file open-2014-0078-original-submission.pdf]

1  
2  
3  
4  
5  
6  
7  
8  
9  
10  
11  
12  
13  
14  
15  
16  
17  
18  
19  
20  
21  
22  
23  
24  
25  
26  
27  
28  
29  
30  
31  
32  
33  
34  
35  
36  
37  
38  
39  
40  
41  
42  
43  
44  
45  
46  
47  
48  
49  
50  
51  
52  
53  
54  
55  
56  
57  
58  
59  
60

**Trends in the Co-Prescription of  
Proton Pump Inhibitors with Clopidogrel:  
An Ecological Study**

David N. Juurlink MD, PhD  
Tara Gomes MHSc.  
J. Michael Paterson, MSc.  
Chelsea Hellings, MSc.  
Muhammad M. Mamdani, PharmD, MPH

**Affiliations:** The Institute for Clinical Evaluative Sciences (DNJ, TG, JMP, CH, MMM); Sunnybrook Research Institute (DNJ); Li Ka-Shing Knowledge Institute of St. Michael's Hospital (TG; MMM); Institute of Health Policy, Management, and Evaluation, and the Leslie Dan Faculty of Pharmacy (TG) at the University of Toronto; and the Department of Family Medicine, McMaster University (JMP)

**Word Count:** 1621

**Correspondence:** Dr. David Juurlink  
G Wing 106  
Sunnybrook Health Sciences Centre  
2075 Bayview Avenue, Toronto, Ontario CANADA M4N 3M5  
Tel: (416) 480-6100 ext: 3039  
Fax: (416) 480-6048  
[dnj@ices.on.ca](mailto:dnj@ices.on.ca)

**Key Words:** clopidogrel; proton pump inhibitors

**ABSTRACT**

**Background:** In early 2009, two observational studies and a Food and Drug Administration advisory addressed the drug interaction between proton pump inhibitors (PPIs) and clopidogrel. A study in *The Canadian Medical Association Journal* suggested pantoprazole could be used safely in this setting, while the other study and the advisory did not distinguish among PPIs. We examined the extent to which these events influenced PPI prescribing among clopidogrel recipients.

**Methods:** Using population-based prescription claims data, we conducted a cross-sectional time series analysis of Ontarians aged 66 or older treated with clopidogrel between April 1, 1999 and September 30, 2013. Each quarter, we determined the proportion of clopidogrel recipients dispensed a PPI, and the proportion of these that were issued for pantoprazole or other PPIs. The primary outcome of interest was the change in pantoprazole utilization.

**Results:** Pantoprazole use increasing dramatically in 2009, from 23.7% of all PPI prescriptions issued to patients receiving clopidogrel in late 2008 to 52.5% of all such prescriptions by late 2009 ( $p < 0.0001$ ). This trend continued into 2013. A transient decline of approximately 10% was noted in overall PPI use was also observed beginning in early 2009.

1  
2  
3 **Interpretation:** A major shift occurred in the prescribing of PPIs with clopidogrel  
4  
5 beginning in early 2009. Pantoprazole rapidly became the most commonly used agent,  
6  
7 while overall PPI use declined slightly. The latter finding may reflect insufficiently  
8  
9 detailed regulatory warnings or suboptimal translation of new drug safety information to  
10  
11 clinical practice.  
12  
13  
14  
15  
16  
17  
18  
19  
20  
21  
22  
23  
24  
25  
26  
27  
28  
29  
30  
31  
32  
33  
34  
35  
36  
37  
38  
39  
40  
41  
42  
43  
44  
45  
46  
47  
48  
49  
50  
51  
52  
53  
54  
55  
56  
57  
58  
59  
60

Confidential

## INTRODUCTION

1  
2  
3  
4  
5  
6  
7  
8  
9  
10  
11  
12  
13  
14  
15  
16  
17  
18  
19  
20  
21  
22  
23  
24  
25  
26  
27  
28  
29  
30  
31  
32  
33  
34  
35  
36  
37  
38  
39  
40  
41  
42  
43  
44  
45  
46  
47  
48  
49  
50  
51  
52  
53  
54  
55  
56  
57  
58  
59  
60

Clopidogrel is a widely used drug for patients with ischemic heart disease and stroke. As a prodrug, its antiplatelet activity is partly dependent upon conversion to an active metabolite by cytochrome P450 isoenzyme 2C19.(1,2) Over the past several years, many studies have explored the possibility that some proton pump inhibitors (PPIs) – omeprazole in particular - might inhibit this process, thereby attenuating the effect of clopidogrel. In 2006, Gilard and colleagues published the first report describing a potential pharmacodynamic interaction between omeprazole and clopidogrel, (3) a finding that was subsequently confirmed by others.(4-6) However, in 2009 Cuisset et al. showed that the same phenomenon did not occur with pantoprazole,(6) an observation predicted by the fact that pantoprazole does not inhibit the same cytochrome enzyme.(7) This finding was also reaffirmed by several other groups, (8-11) including a randomized crossover study by Angiolillo et al. (12)

In early 2009, we published the first observational study of the clinical consequences of this newly described drug interaction.(13) We found that among patients taking clopidogrel following acute myocardial infarction, use of PPIs was associated with readmission for myocardial infarction; however, this risk did not extend to pantoprazole, as predicted by the drug's pharmacology. Five weeks after the online publication of our study, another observational study was published using different methodology but reaching a similar conclusion.(14) These findings were controversial; over the ensuing two years they were disputed by other studies,(15,16) including one randomized controlled trial that found that the combination of omeprazole and clopidogrel was associated with a significantly lower risk of gastrointestinal hemorrhage

1  
2  
3 and no increased risk of adverse cardiovascular events.(17) However, the trial's  
4  
5 intervention was a proprietary product (CGT-2168) specifically formulated to avoid a  
6  
7 pharmacokinetic interaction between clopidogrel and omeprazole, thereby precluding  
8  
9 valid inference about the safety of the drug combination.(18)  
10  
11

12 An important finding of our 2009 study was that while PPIs as a class were  
13  
14 associated with an increased risk of recurrent myocardial infarction, pantoprazole was  
15  
16 not. In both the abstract and the media attention that accompanied our study, we  
17  
18 emphasized that patients need not avoid the concomitant use of PPIs with clopidogrel  
19  
20 when both drugs were necessary. Rather, when a PPI was indicated, we suggested the  
21  
22 preferential use of pantoprazole on the basis of our findings, the known pharmacology  
23  
24 of these drugs (7) and the previously reported findings of Cuisset and colleagues.(6) In  
25  
26 contrast, an advisory issued by the United States Food and Drug Administration two  
27  
28 days before our publication (19), as well as a large observational study published in the  
29  
30 Journal of the American Medical Association shortly after ours (14) did not distinguish  
31  
32 among the PPIs. Indeed, the Food and Drug Administration advisory suggested that  
33  
34 “healthcare providers should re-evaluate the need for starting or continuing treatment  
35  
36 with a PPI...”. (19) Similarly, a Health Canada advisory issued in August 2009 also did  
37  
38 not distinguish among PPIs.  
39  
40  
41  
42  
43  
44

45 Our study(13) the one that followed,(14) and the contemporaneous advisory  
46  
47 received considerable media attention nationally and internationally. This is highly  
48  
49 unusual in the field of drug interactions, which are generally described in basic  
50  
51 pharmacology literature and case reports, with gradual diffusion into clinical practice. In  
52  
53  
54  
55  
56  
57  
58  
59  
60

1  
2  
3 the present study, we examined the extent to which these publications and the Food  
4 and Drug Administration advisory influenced trends in the use of PPIs with clopidogrel.  
5  
6  
7  
8  
9

## 10 **METHODS**

### 11 **Setting**

12  
13  
14 We conducted a population-based cross-sectional study of Ontario residents  
15 aged 66 and older prescribed clopidogrel between April 1, 1999 and March 31, 2010.  
16  
17 These individuals have universal access to health services and prescription drug  
18 coverage. The study was approved by the Research Ethics Board of Sunnybrook  
19 Health Sciences Centre, Toronto, Ontario.  
20  
21  
22  
23  
24  
25  
26  
27  
28  
29  
30  
31

### 32 **Data Sources**

33  
34  
35 We identified prescriptions for PPIs and clopidogrel using the computerized  
36 prescription records of the Ontario Public Drug Program, which contains comprehensive  
37 records of prescription medications dispensed to Ontario residents 65 years of age or  
38 older. Patient age was obtained from the Registered Persons Database, which  
39 contains demographic information on all Ontarians ever issued a health card. These  
40 databases were anonymously linked using encrypted 10-digit health card numbers.  
41  
42  
43  
44  
45  
46  
47  
48  
49  
50  
51

### 52 **Identification of Patients and Rates**

53  
54 In each quarter of each calendar year, we identified all patients who received at  
55 least one prescription for clopidogrel. Patients were excluded if they had invalid  
56  
57  
58  
59  
60

1  
2  
3 identifiers, if their age was unknown, or if they were younger than 66 on the date of their  
4  
5  
6  
7  
8  
9  
10  
11  
12  
13  
14  
15  
16  
17  
18  
19  
20  
21  
22  
23  
24  
25  
26  
27  
28  
29  
30  
31  
32  
33  
34  
35  
36  
37  
38  
39  
40  
41  
42  
43  
44  
45  
46  
47  
48  
49  
50  
51  
52  
53  
54  
55  
56  
57  
58  
59  
60

identifiers, if their age was unknown, or if they were younger than 66 on the date of their  
clopidogrel prescription. Among clopidogrel recipients, we identified those who received  
any prescription for pantoprazole, omeprazole, rabeprazole, lansoprazole or  
esomeprazole during the quarter.

## Analysis

In each quarter, we calculated the proportion of patients treated with clopidogrel  
who also received a PPI therapy during that same quarter. Analyses were conducted  
for all PPIs as a group, and then stratified into pantoprazole versus other PPIs  
(omeprazole, rabeprazole, lansoprazole or esomeprazole).

We used autoregressive integrated moving average (ARIMA) models to evaluate  
changes in quarterly PPI prescribing rates beginning in the first quarter of 2009.  
Stationarity was assessed using the autocorrelation function and the augmented Dickey  
Fuller test. The autocorrelation, partial autocorrelation, and inverse autocorrelation  
functions were used to model parameter appropriateness and seasonality. The  
presence of white noise was assessed by examining the autocorrelation at various lags  
using the Lung-Box chi-square statistic. Analyses were conducted using SAS 9.1  
software (SAS Institute, Cary, North Carolina).

## RESULTS

During the nearly 15-year study period, the number of people aged 66 years or  
older who received clopidogrel increased from 330 in the second quarter of 1999 (the  
first full quarter of clopidogrel's availability on the Ontario formulary) to 83,921 by the

1  
2  
3 third quarter of 2013. Similarly, co-prescription of a PPI with clopidogrel increased  
4 considerably over this same period, from 12.7% (42 of 330 patients) to 41.6% (34,879  
5 of 83,921 patients) (Figure). In the final quarter of 2008, immediately preceding the  
6 publications and Food and Drug Administration advisory, rabeprazole was the PPI most  
7 commonly prescribed with clopidogrel, reflecting its lower cost and preferred status on  
8 the provincial formulary.  
9

10  
11 A major shift in PPI prescribing patterns became evident in 2009. The proportion  
12 of clopidogrel patients receiving pantoprazole increased from 9.4% (4,446 of 47,344  
13 clopidogrel recipients) in the final quarter of 2008 - prior to the two publications and FDA  
14 advisory - to 20.0% (12,433 of 62,129 clopidogrel recipients) by the final quarter of 2009  
15 (p<0.0001) (Figure). This was accompanied by a corresponding decrease in the use of  
16 all other PPIs with clopidogrel, from roughly 31.5% in late 2008 (14,926 of 47,344  
17 clopidogrel recipients) to 20.0% in late 2009 (12,443 of 62,129 clopidogrel recipients;  
18 p=0.0002). This change was sustained; by the third quarter of 2013, nearly a third  
19 (24,768 of 83,921; 29.5%) of clopidogrel recipients received pantoprazole, while only  
20 10,811 (12.9%) received a different PPI.  
21  
22

23  
24 We also observed a decline in the overall use of PPIs among patients receiving  
25 clopidogrel. In the first quarter of 2010, 38.3% (13,170 of 62,843) older Ontarians taking  
26 clopidogrel also received a PPI, roughly 10% lower than the projected estimate of  
27 42.9%. As with the primary analysis, the observed trend was significantly different from  
28 expected trends generated by ARIMA models (P<0.001). In absolute terms, the  
29 difference between observed and expected PPI utilization represents approximately  
30  
31  
32  
33  
34  
35  
36  
37  
38  
39  
40  
41  
42  
43  
44  
45  
46  
47  
48  
49  
50  
51  
52  
53  
54  
55  
56  
57  
58  
59  
60



1  
2  
3 2885 fewer older individuals co-prescribed a PPI than expected in the first quarter of  
4  
5 2010.  
6  
7  
8  
9

## 10 **INTERPRETATION**

### 11 **Main findings**

12  
13 We observed major changes in the prescribing of PPIs to clopidogrel recipients in  
14  
15 2009, with a substantial increase in the use of pantoprazole and a modest decrease in  
16  
17 overall PPI use. We speculate that the shift towards preferential use of pantoprazole  
18  
19 among patients taking clopidogrel resulted from media coverage associated with our  
20  
21 initial publication (13), since neither the contemporaneous regulatory warning (19) nor  
22  
23 the subsequent observational study (14) distinguished among the available PPIs.  
24  
25  
26  
27

28  
29 The clinical impact of these prescribing changes is unclear. The mass shift  
30  
31 toward preferential use of pantoprazole may have favourably influenced cardiac  
32  
33 outcomes among some clopidogrel recipients. Conversely, because overall PPI  
34  
35 prescribing among clopidogrel recipients declined slightly following our publication, this  
36  
37 may have been associated with harm – specifically, an increase in gastrointestinal  
38  
39 hemorrhage. Neither of these hypotheses is easily tested given the intricacies of the  
40  
41 drug interaction,(20) which remain the subject of some controversy.{Wedemeyer, 2014  
42  
43  
44  
45  
46 27 /id}  
47

48  
49 It is important to reiterate that recent data clearly indicate that the use of a PPI  
50  
51 with clopidogrel reduces the risk of gastrointestinal hemorrhage. (17) While the  
52  
53 observed decline in overall PPI use in 2009 may reflect appropriate discontinuation of  
54  
55 PPI therapy in some patients, it may also reflect misinterpretation of our study (in which  
56  
57  
58  
59  
60

1  
2  
3 the safety of concomitant pantoprazole therapy was clearly documented) or the  
4  
5 wholesale avoidance of PPI therapy on the assumption, either by patients or physicians,  
6  
7 of a “class effect”, as might have been inferred from a subsequent publication (14) or  
8  
9 the widely publicized Food and Drug Administration advisory.(19) This highlights the  
10  
11 importance of clearly communicating within-class differences in drug effects when they  
12  
13 exist.  
14  
15  
16  
17  
18  
19

## 20 **Limitations**

21  
22 The principal limitation of this study is that we focused solely on drug utilization  
23  
24 trends. Because this was an ecological rather than a patient-level analysis, and  
25  
26 because it is generally accepted that the interaction between PPIs and clopidogrel is not  
27  
28 likely to present a hazard for most patients (20), we did not examine whether the shift in  
29  
30 PPI prescribing was associated with differences in clinical outcomes at the population  
31  
32 level. We also have no information regarding the extent to which these results can be  
33  
34 generalized to other jurisdictions.  
35  
36  
37  
38  
39  
40

## 41 **Conclusions**

42  
43 In early 2009, the prescribing of PPIs to patients taking clopidogrel changed  
44  
45 dramatically. We believe this reflects the response to a widely publicized study of a  
46  
47 newly described drug interaction of potential relevance to large numbers of patients.  
48  
49 Our study highlights the substantial impact that observational research can have on  
50  
51 prescribing behavior, and indicates that this response can be both rapid and drug-  
52  
53 specific when a clear message is communicated to clinicians and patients.  
54  
55  
56  
57  
58  
59  
60

## ACKNOWLEDGEMENTS

This study was supported by a grant from the Ontario Ministry of Health and Long-Term Care (MOHLTC) Drug Innovation Fund and the Institute for Clinical Evaluative Sciences (ICES), which is funded by an annual grant from the Ontario MOHLTC. We thank Jen Levi for assistance with manuscript preparation and Brogan Inc., Ottawa for use of their Drug Product and Therapeutic Class Database.

The opinions, results, and conclusions are those of the authors, and no endorsement by Ontario's Ministry of Health and Long-term Care or by the Institute for Clinical Evaluative Sciences is intended or should be inferred. Dr. Muhammad Mamdani has received honoraria from Boehringer Ingelheim, Pfizer, Bristol-Myers Squibb, and Bayer. *All other authors report no conflicts of interest.*

### Author Contributions:

DMJ conceived of the study and drafted the manuscript. All authors participated in the design, interpretation and critical revision of the manuscript for intellectual content, and all approved the final version. TG performed the data extraction and the time series analysis. DNJ is the study guarantor. We thank Mariam Mukati for assistance with manuscript preparation.

## Reference List

- 1 Giusti B, Gori AM, Marcucci R, Saracini C, Sestini I, Paniccia R, et al. Cytochrome P450 2C19 loss-of-function polymorphism, but not CYP3A4 IVS10 + 12G/A and P2Y12 T744C polymorphisms, is associated with response variability to dual antiplatelet treatment in high-risk vascular patients. *Pharmacogenet Genomics* 2007;17:1057-64.
- 2 Brandt JT, Close SL, Iturria SJ, Payne CD, Farid NA, Ernest CS, et al. Common polymorphisms of CYP2C19 and CYP2C9 affect the pharmacokinetic and pharmacodynamic response to clopidogrel but not prasugrel. *J Thromb Haemost* 2007;5:2429-36.
- 3 Gilard M, Arnaud B, Le Gal G, Abgrall JF, Boschhat J. Influence of omeprazol on the antiplatelet action of clopidogrel associated to aspirin. *J Thromb Haemost* 2006;4:2508-9.
- 4 Siriswangvat S, Sansanayudh N, Nathisuwan S, Panomvana D. Comparison between the effect of omeprazole and rabeprazole on the antiplatelet action of clopidogrel. *Circ J* 2010;74:2187-92.
- 5 Gilard M, Arnaud B, Cornily JC, Le Gal G, Lacut K, Le Calvez G, et al. Influence of omeprazole on the antiplatelet action of clopidogrel associated with aspirin: the randomized, double-blind OCLA (Omeprazole CLopidogrel Aspirin) study. *J Am Coll Cardiol* 2008;51:256-60.
- 6 Cuisset T, Frere C, Quilici J, Poyet R, Gaborit B, Bali L, et al. Comparison of omeprazole and pantoprazole influence on a high 150-mg clopidogrel maintenance dose the PACA (Proton Pump Inhibitors And Clopidogrel Association) prospective randomized study. *J Am Coll Cardiol* 2009;54:1149-53.
- 7 Li XQ, Andersson TB, Ahlstrom M, Weidolf L. Comparison of inhibitory effects of the proton pump-inhibiting drugs omeprazole, esomeprazole, lansoprazole, pantoprazole, and rabeprazole on human cytochrome P450 activities. *Drug Metab Dispos* 2004;32:821-7.
- 8 Siller-Matula JM, Spiel AO, Lang IM, Kreiner G, Christ G, Jilma B. Effects of pantoprazole and esomeprazole on platelet inhibition by clopidogrel. *Am Heart J* 2009;157:148-5.
- 9 Fontes-Carvalho R, Albuquerque A, Araujo C, Pimentel-Nunes P, Ribeiro VG. Omeprazole, but not pantoprazole, reduces the antiplatelet effect of clopidogrel: a randomized clinical crossover trial in patients after myocardial infarction evaluating the clopidogrel-PPIs drug interaction. *Eur J Gastroenterol Hepatol* 2011;23:396-404.
- 10 Neubauer H, Engelhardt A, Kruger JC, Lask S, Borgel J, Mugge A, et al. Pantoprazole does not influence the antiplatelet effect of clopidogrel-a whole blood

1  
2  
3 aggregometry study after coronary stenting. *J Cardiovasc Pharmacol* 2010;56:91-  
4 7.

- 5  
6  
7 11 Zuern CS, Geisler T, Lutlisky N, Winter S, Schwab M, Gawaz M. Effect of  
8 comedication with proton pump inhibitors (PPIs) on post-interventional residual  
9 platelet aggregation in patients undergoing coronary stenting treated by dual  
10 antiplatelet therapy. *Thromb Res* 2010;125:e51-e54.
- 11  
12 12 Angiolillo DJ, Gibson CM, Cheng S, Ollier C, Nicolas O, Bergougnan L, et al.  
13 Differential effects of omeprazole and pantoprazole on the pharmacodynamics and  
14 pharmacokinetics of clopidogrel in healthy subjects: randomized, placebo-  
15 controlled, crossover comparison studies. *Clin Pharmacol Ther* 2011;89:65-74.
- 16  
17  
18 13 Juurlink DN, Gomes T, Ko DT, Szmitko PE, Austin PC, Tu JV, et al. A population-  
19 based study of the drug interaction between proton pump inhibitors and  
20 clopidogrel. *CMAJ* 2009;180:713-8.
- 21  
22  
23 14 Ho PM, Maddox TM, Wang L, Fihn SD, Jesse RL, Peterson ED, et al. Risk of  
24 adverse outcomes associated with concomitant use of clopidogrel and proton  
25 pump inhibitors following acute coronary syndrome. *JAMA* 2009;301:937-44.
- 26  
27  
28 15 Ray WA, Murray KT, Griffin MR, Chung CP, Smalley WE, Hall K, et al. Outcomes  
29 with concurrent use of clopidogrel and proton-pump inhibitors: a cohort study. *Ann*  
30 *Intern Med* 2010;152:337-45.
- 31  
32  
33 16 O'Donoghue ML, Braunwald E, Antman EM, Murphy SA, Bates ER, Rozenman Y,  
34 et al. Pharmacodynamic effect and clinical efficacy of clopidogrel and prasugrel  
35 with or without a proton-pump inhibitor: an analysis of two randomised trials.  
36 *Lancet* 2009;374:989-97.
- 37  
38  
39 17 Bhatt DL, Cryer BL, Contant CF, Cohen M, Lanos A, Schnitzer TJ, et al.  
40 Clopidogrel with or without Omeprazole in Coronary Artery Disease. *N Engl J Med*  
41 2010;363:1909-17.
- 42  
43  
44 18 Juurlink DN. Clopidogrel with or without omeprazole in coronary disease. *N Engl J*  
45 *Med* 2011;364:681-2.
- 46  
47  
48 19 U.S.Food and Drug Administration. Early Communication about an Ongoing Safety  
49 Review of clopidogrel bisulfate (marketed as Plavix). [http://www.fda](http://www.fda.gov/Drugs/DrugSafety/PostmarketDrugSafetyInformationforPatientsandProviders/DrugSafetyInformationforHealthcareProfessionals/ucm079520.htm)  
50 [gov/Drugs/DrugSafety/PostmarketDrugSafetyInformationforPatientsandProviders/](http://www.fda.gov/Drugs/DrugSafety/PostmarketDrugSafetyInformationforPatientsandProviders/DrugSafetyInformationforHealthcareProfessionals/ucm079520.htm)  
51 [DrugSafetyInformationforHealthcareProfessionals/ucm079520.htm](http://www.fda.gov/Drugs/DrugSafety/PostmarketDrugSafetyInformationforPatientsandProviders/DrugSafetyInformationforHealthcareProfessionals/ucm079520.htm) 2009 January  
52 26 [cited 2011 Jul 12]; Available from: URL:  
53 [http://www.fda.gov/Drugs/DrugSafety/PostmarketDrugSafetyInformationforPatients](http://www.fda.gov/Drugs/DrugSafety/PostmarketDrugSafetyInformationforPatientsandProviders/DrugSafetyInformationforHealthcareProfessionals/ucm079520.htm)  
54 [andProviders/DrugSafetyInformationforHealthcareProfessionals/ucm079520.htm](http://www.fda.gov/Drugs/DrugSafety/PostmarketDrugSafetyInformationforPatientsandProviders/DrugSafetyInformationforHealthcareProfessionals/ucm079520.htm)
- 55  
56  
57 20 Juurlink DN. Proton pump inhibitors and clopidogrel: putting the interaction in  
58 perspective. *Circulation* 2009;120:2310-2.
- 59  
60

1  
2  
3  
4  
5  
6  
7  
8  
9  
10  
11  
12  
13  
14  
15  
16  
17  
18  
19  
20  
21  
22  
23  
24  
25  
26  
27  
28  
29  
30  
31  
32  
33  
34  
35  
36  
37  
38  
39  
40  
41  
42  
43  
44  
45  
46  
47  
48  
49  
50  
51  
52  
53  
54  
55  
56  
57  
58  
59  
60

21 Wedemeyer RS, Blume H. Pharmacokinetic drug interaction profiles of proton pump inhibitors: An update. Drug Safety 2014;39(4):201-11.

Confidential

**Figure: Co-prescription of proton pump inhibitors with clopidogrel, 1999 to 2013****Legend:**

Figure demonstrates the co-prescription of PPIs with clopidogrel during each quarter from 1999 through 2013. The solid line indicates total PPI use, stratified into pantoprazole (short dash) and all other PPIs (long dash). For each PPI category, the solid and dashed grey lines represent projected co-prescription rates and 95% confidence intervals, respectively. The shaded vertical bar represents the first quarter of 2009. The change in pantoprazole prescribing at Q1 is described by an ARIMA model (1,1,0) with a step function ( $r^2$  0.997,  $P < 0.0001$ ), while the change in overall PPI use is described by an ARIMA model (2,1,0) with a ramp function ( $r^2$  0.998,  $p < 0.0001$ ).

1  
2  
3  
4  
5  
6  
7  
8  
9  
10  
11  
12  
13  
14  
15  
16  
17  
18  
19  
20  
21  
22  
23  
24  
25  
26  
27  
28  
29  
30  
31  
32  
33  
34  
35  
36  
37  
38  
39  
40  
41  
42  
43  
44  
45  
46  
47  
48  
49

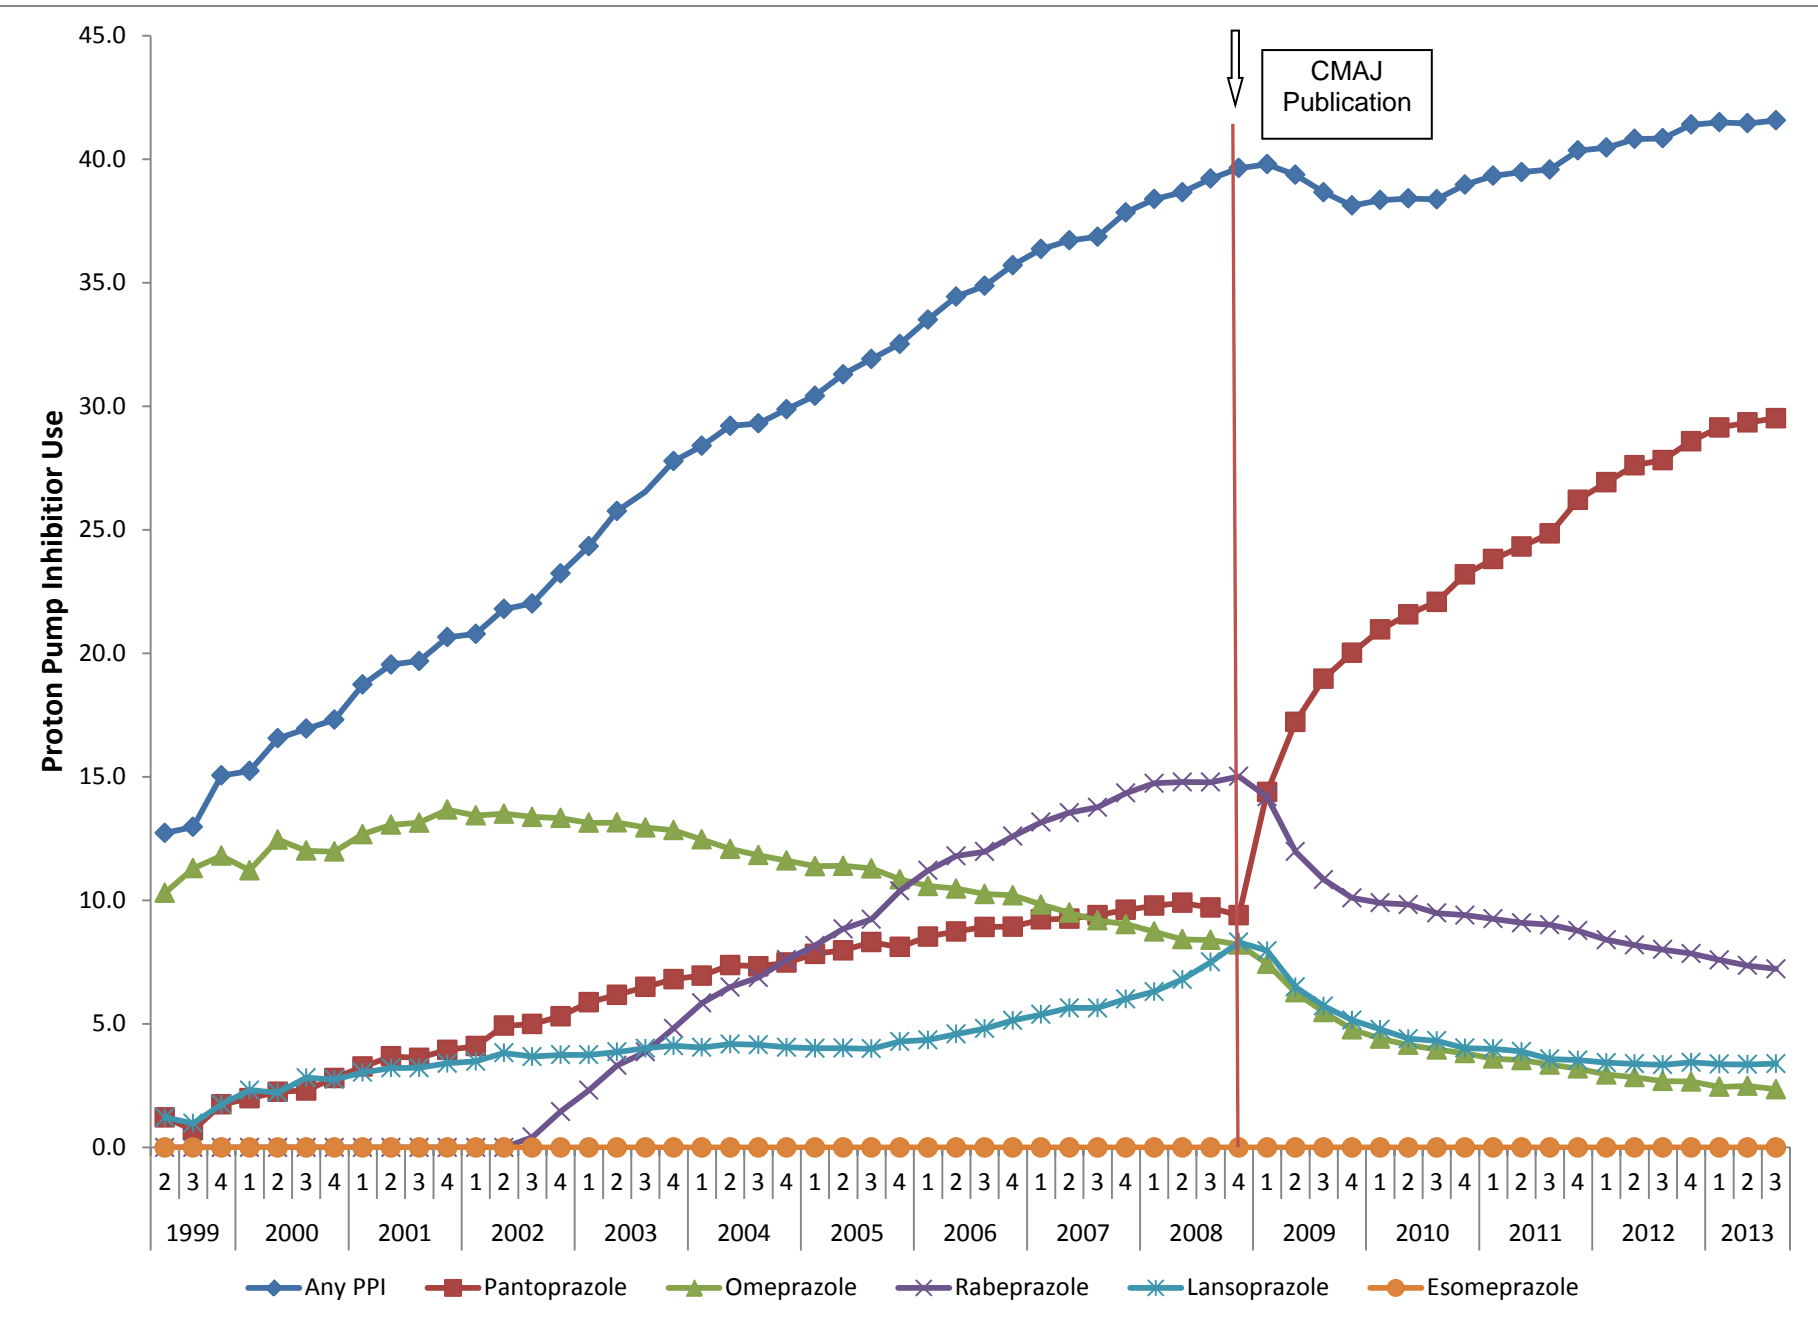



## STROBE Statement—checklist of items that should be included in reports of observational studies

|                              | PAGE(s) | Recommendation                                                                                                                                                                                                                                                                                                                                                                                                                                                                                                                                                                                                                                                                                   |
|------------------------------|---------|--------------------------------------------------------------------------------------------------------------------------------------------------------------------------------------------------------------------------------------------------------------------------------------------------------------------------------------------------------------------------------------------------------------------------------------------------------------------------------------------------------------------------------------------------------------------------------------------------------------------------------------------------------------------------------------------------|
| <b>Title and abstract</b>    | 1-3     | (a) Indicate the study's design with a commonly used term in the title or the abstract<br>(b) Provide in the abstract an informative and balanced summary of what was done and what was found                                                                                                                                                                                                                                                                                                                                                                                                                                                                                                    |
| <b>Introduction</b>          |         |                                                                                                                                                                                                                                                                                                                                                                                                                                                                                                                                                                                                                                                                                                  |
| Background/rationale         | 4-6     | Explain the scientific background and rationale for the investigation being reported                                                                                                                                                                                                                                                                                                                                                                                                                                                                                                                                                                                                             |
| Objectives                   | 5-6     | State specific objectives, including any prespecified hypotheses                                                                                                                                                                                                                                                                                                                                                                                                                                                                                                                                                                                                                                 |
| <b>Methods</b>               |         |                                                                                                                                                                                                                                                                                                                                                                                                                                                                                                                                                                                                                                                                                                  |
| Study design                 | 6-7     | Present key elements of study design early in the paper                                                                                                                                                                                                                                                                                                                                                                                                                                                                                                                                                                                                                                          |
| Setting                      | 6       | Describe the setting, locations, and relevant dates, including periods of recruitment, exposure, follow-up, and data collection                                                                                                                                                                                                                                                                                                                                                                                                                                                                                                                                                                  |
| Participants                 | 6       | (a) <i>Cohort study</i> —Give the eligibility criteria, and the sources and methods of selection of participants. Describe methods of follow-up<br><i>Case-control study</i> —Give the eligibility criteria, and the sources and methods of case ascertainment and control selection. Give the rationale for the choice of cases and controls<br><i>Cross-sectional study</i> —Give the eligibility criteria, and the sources and methods of selection of participants<br>(b) <i>Cohort study</i> —For matched studies, give matching criteria and number of exposed and unexposed<br><i>Case-control study</i> —For matched studies, give matching criteria and the number of controls per case |
| Variables                    | 6-7     | Clearly define all outcomes, exposures, predictors, potential confounders, and effect modifiers. Give diagnostic criteria, if applicable                                                                                                                                                                                                                                                                                                                                                                                                                                                                                                                                                         |
| Data sources/<br>measurement | 6       | For each variable of interest, give sources of data and details of methods of assessment (measurement). Describe comparability of assessment methods if there is more than one group                                                                                                                                                                                                                                                                                                                                                                                                                                                                                                             |
| Bias                         | N/A     | Describe any efforts to address potential sources of bias                                                                                                                                                                                                                                                                                                                                                                                                                                                                                                                                                                                                                                        |
| Study size                   | N/A     | Explain how the study size was arrived at                                                                                                                                                                                                                                                                                                                                                                                                                                                                                                                                                                                                                                                        |
| Quantitative variables       | 7       | Explain how quantitative variables were handled in the analyses. If applicable, describe which groupings were chosen and why                                                                                                                                                                                                                                                                                                                                                                                                                                                                                                                                                                     |
| Statistical methods          | 7       | (a) Describe all statistical methods, including those used to control for confounding<br>(b) Describe any methods used to examine subgroups and interactions<br>(c) Explain how missing data were addressed<br>(d) <i>Cohort study</i> —If applicable, explain how loss to follow-up was addressed<br><i>Case-control study</i> —If applicable, explain how matching of cases and controls was addressed<br><i>Cross-sectional study</i> —If applicable, describe analytical methods taking account of sampling strategy<br>(e) Describe any sensitivity analyses                                                                                                                                |

Continued on next page

1  
2  
3  
4  
5  
6  
7  
8  
9  
10  
11  
12  
13  
14  
15  
16  
17  
18  
19  
20  
21  
22  
23  
24  
25  
26  
27  
28  
29  
30  
31  
32  
33  
34  
35  
36  
37  
38  
39  
40  
41  
42  
43  
44  
45  
46  
47  
48  
49  
50  
51  
52  
53  
54  
55  
56  
57  
58  
59  
60

| <b>Results</b>           |              |                                                                                                                                                                                                                                                                                                                                                                                                               |
|--------------------------|--------------|---------------------------------------------------------------------------------------------------------------------------------------------------------------------------------------------------------------------------------------------------------------------------------------------------------------------------------------------------------------------------------------------------------------|
| Participants             | 7-8          | (a) Report numbers of individuals at each stage of study—eg numbers potentially eligible, examined for eligibility, confirmed eligible, included in the study, completing follow-up, and analysed<br>(b) Give reasons for non-participation at each stage<br>(c) Consider use of a flow diagram                                                                                                               |
| Descriptive data         | 7-8          | (a) Give characteristics of study participants (eg demographic, clinical, social) and information on exposures and potential confounders<br>(b) Indicate number of participants with missing data for each variable of interest<br>(c) <i>Cohort study</i> —Summarise follow-up time (eg, average and total amount)                                                                                           |
| Outcome data             | 7-8 & figure | <i>Cohort study</i> —Report numbers of outcome events or summary measures over time<br><i>Case-control study</i> —Report numbers in each exposure category, or summary measures of exposure<br><i>Cross-sectional study</i> —Report numbers of outcome events or summary measures                                                                                                                             |
| Main results             | 7-8 & figure | (a) Give unadjusted estimates and, if applicable, confounder-adjusted estimates and their precision (eg, 95% confidence interval). Make clear which confounders were adjusted for and why they were included<br>(b) Report category boundaries when continuous variables were categorized<br>(c) If relevant, consider translating estimates of relative risk into absolute risk for a meaningful time period |
| Other analyses           | 8-9          | Report other analyses done—eg analyses of subgroups and interactions, and sensitivity analyses                                                                                                                                                                                                                                                                                                                |
| <b>Discussion</b>        |              |                                                                                                                                                                                                                                                                                                                                                                                                               |
| Key results              | 9            | Summarise key results with reference to study objectives                                                                                                                                                                                                                                                                                                                                                      |
| Limitations              | 10           | Discuss limitations of the study, taking into account sources of potential bias or imprecision. Discuss both direction and magnitude of any potential bias                                                                                                                                                                                                                                                    |
| Interpretation           | 9-10         | Give a cautious overall interpretation of results considering objectives, limitations, multiplicity of analyses, results from similar studies, and other relevant evidence                                                                                                                                                                                                                                    |
| Generalisability         | 10           | Discuss the generalisability (external validity) of the study results                                                                                                                                                                                                                                                                                                                                         |
| <b>Other information</b> |              |                                                                                                                                                                                                                                                                                                                                                                                                               |
| Funding                  | 11           | Give the source of funding and the role of the funders for the present study and, if applicable, for the original study on which the present article is based                                                                                                                                                                                                                                                 |

**Note:** An Explanation and Elaboration article discusses each checklist item and gives methodological background and published examples of transparent reporting. The STROBE checklist is best used in conjunction with this article (freely available on the Web sites of PLoS Medicine at <http://www.plosmedicine.org/>, Annals of Internal Medicine at <http://www.annals.org/>, and Epidemiology at <http://www.epidem.com/>). Information on the STROBE Initiative is available at [www.strobe-statement.org](http://www.strobe-statement.org).
